# Supplementary material for: The bHLH Transcription Factor OsbHLH057 Regulates Iron Homeostasis in Rice
Source: Int J Mol Sci. 2022 Nov 28;23(23):14869. doi: 10.3390/ijms232314869 (PMC9739582; doi:10.3390/ijms232314869)
Supplement: Supplementary file 1 [file ijms-23-14869-s001.zip › Table S1.xlsx]

## Sheet: Sheet1
Table S1. Primers used in this study.
Primers name	Sequences (5'-3')
Primers for CRISPR-Cas9 target
OsbHLH057-gRNA1-F	GGCAGTCTTCGACTGCCCTCTGA
OsbHLH057-gRNA1-R	AAACTCAGAGGGCAGTCGAAGAC
OsbHLH057-gRNA2-F	GGCAACCAAGCTCCAAAGCATGC
OsbHLH057-gRNA2-R	AAACCATGCTTTGGAGCTTGGTC
Primers of CRISPR-Cas9 targeted DNA amplification
OsbHLH057-PCR-F1	CAAATCTCCTCGCGACCTC
OsbHLH057-PCR-R1	CAATTACCAGGCGTTCGGAG
OsbHLH057-PCR-F2	CCAGTGCTGAAATCAATGGC
OsbHLH057-PCR-R2	CTTCAACTTCTGTGCCTCAC
ProOsbHLH057::GUS
OsbHLH057-GUS-F	CAGGTCGACTCTAGAGGATCCTCAGTGTACCTGGATGGCAGTCCT
OsbHLH057-GUS-R	CCTCAGATCTACCATGGTACCGGCTGCGGGGGGGTGGGG
Primers for subcellular localization
OsbHLH057-GFP-F	ATTTACGAACGATAGCCATGGTCATGGCCTCCCCGGAGGGCT
OsbHLH057-GFP-R	GTACCGTCGACTGCAGAATTCTGCAACAGGAGGGCA
Primers for transactivation activity assays
BD-OsbHLH057-F	TCGTCTAGAACTAGTGGATCCATGGCCTCCCCGGAGGGC
BD-OsbHLH057-R	TTTGCGGAGTACCCGGGTACCTTATGCAACAGGAGGGCATGAC
Primers for Y2H assays
pGADT7-OsbHLH057-F	GCCATGGAGGCCAGTGAATTCATGGCCTCCCCGGAGGGCT
pGADT7-OsbHLH057-R	AGCTCGAGCTCGATGGATCCTTATGCAACAGGAGGGCATGACTTG
pGBKT7-OsbHLH057-F	ATGGCCATGGAGGCCGAATTCATGGCCTCCCCGGAGGGCT
pGBKT7-OsbHLH057-R	CCGCTGCAGGTCGACGGATCCTTATGCAACAGGAGGGCATGACTTG
pGADT7-OsPRI1-F	GCCATGGAGGCCAGTGAATTCATGTCCGGTACCCCGGCG
pGADT7-OsPRI1-R	AGCTCGAGCTCGATGGATCCTTACGCGACAGGCGGGCA
pGBKT7-OsHRZ1C-F	ATGGCCATGGAGGCCGAATTCTTCAAGCCTGGATGGAAGGACA
pGBKT7-OsHRZ1C-R	CCGCTGCAGGTCGACGGATCCCTAGTTTGGCGTAGAACAATCTGC
pGBKT7-OsHRZ2C-F	ATGGCCATGGAGGCCGAATTCATACGAAAGGTTTCTCGTGATTCT
pGBKT7-OsHRZ2C-R	CCGCTGCAGGTCGACGGATCCTTAATCTGATGTTGAACAATCAGC
Primers for RT-qPCR
OsNAS1-F	GTCTAACAGCCGGACGATCGAAAGG
OsNAS1-R	TTTCTCACTGTCATACACAGATGGC
OsYSL15-F	AACATAAGGGGGACTGGTAC
OsYSL15-R	TGATTACCGCAATGATGCTTAG
OsIRO2-F	CTCCCATCGTTTCGGCTACCT
OsIRO2-R	GCTGGGCACTCCTCGTTGATC
OsTOM1-F	TCTACGACGGCAATGTCATTCT
OsTOM1-R	AATATCATTTGATCCCCTGGGA
OsNAAT1-F	CAAGCCCGAAGGATCCATGTT
OsNAAT1-R	ACACTCCCTGGGCAAAGAAT
OsActin1-F	GTCGTACCACAGGTATTGTGTTGG
OsActin1-R	GGTGAATGAGTAACCACGCTCC
